# Supplementary material for: Paradoxical suppression of small RNA activity at high Hfq concentrations due to random-order binding
Source: PubMed Central journal article supplement — Nucleic Acids Res. 2015 Aug 10;43(17):8502–15. doi: 10.1093/nar/gkv777 (PMC4787825; doi:10.1093/nar/gkv777), 2015-08-10
Supplement: supp_gkv777_Sagawa_et_al_SupplementaryMaterials.pdf [file supp_gkv777_Sagawa_et_al_SupplementaryMaterials.pdf]

# **SUPPLEMENTARY MATERIAL**

## **Paradoxical suppression of small RNA activity at high Hfq concentrations due to random-order binding**

**Shiori Sagawa<sup>1,2</sup>, Jung-Eun Shin<sup>1,2</sup>, Razika Hussein<sup>1</sup> and Han N. Lim<sup>1,3</sup>**

<sup>1</sup> Department of Integrative Biology, University of California Berkeley

<sup>2</sup> Contributed equally

<sup>3</sup> Corresponding author: [hanlim@berkeley.edu](mailto:hanlim@berkeley.edu)

## Supplementary Methods

### Mathematical model

The differential equations for the system, which are shown below, include the association and dissociation of the sRNAs (S), target mRNAs (T), Hfq (H), sRNA-Hfq (SH), mRNA-Hfq (TH), sRNA-mRNA-Hfq (SHT), duplex (D) and target protein (P).

$$\dot{S} = \alpha_S + k_{-S}SH + k_{-SHT}SHT - k_S S \cdot H - k_{SHT}S \cdot TH - \beta_S S, \quad [1]$$

$$\dot{T} = \alpha_T + k_{-T}TH + k_{-TSH}SHT - k_T T \cdot H - k_{TSH}T \cdot SH - \beta_T T, \quad [2]$$

$$\dot{H} = \alpha_H + k_{-S}SH + k_{-T}TH + k_{Dup}SHT + \beta_{SH}SH + \beta_{TH}TH + \beta_{SHT}SHT - k_S S \cdot H - k_T T \cdot H - \beta_H H, \quad [3]$$

$$\dot{SH} = k_S S \cdot H + k_{-TSH}SHT - k_{-S}SH - k_{TSH}T \cdot SH - \beta_{SH}SH - \beta_H SH, \quad [4]$$

$$\dot{TH} = k_T T \cdot H + k_{-SHT}SHT - k_{-T}TH - k_{SHT}S \cdot TH - \beta_{TH}TH - \beta_H TH, \quad [5]$$

$$\dot{SHT} = k_{SHT}S \cdot TH + k_{TSH}T \cdot SH - (k_{-SHT} + k_{-TSH} + k_{Dup} + \beta_{SHT} + \beta_H)SHT, \quad [6]$$

$$\dot{D} = k_{Dup}SHT - \beta_D D, \text{ and} \quad [7]$$

$$\dot{P} = \alpha_P T - \beta_P P, \quad [8a]$$

$$\text{or } \dot{P} = \alpha_P (T + TH + SHT) - \beta_P P \quad [8b]$$

$$\text{or } \dot{P} = \alpha_P D - \beta_P P. \quad [8c]$$

**Eq. 8a, 8b or 8c** were used when the free mRNA, free and bound mRNA, or duplex was translated.

Where possible the simulations used biologically relevant values obtained from experiments as previously reported (1).  $\alpha_S$ ,  $\alpha_T$  and  $\alpha_H$  are the production rates for the sRNA, mRNA and Hfq protein (respective values are 1, 1 and 0.3 nM·min<sup>-1</sup>).  $\alpha_P$  is the protein production rate (value = 5 nM·(mRNA nM)<sup>-1</sup>·min<sup>-1</sup>).  $\beta_S$ ,  $\beta_T$ ,  $\beta_{SH}$ ,  $\beta_{TH}$ ,  $\beta_{SHT}$ , and  $\beta_D$  are the degradation rate constants for the sRNA, mRNA, sRNA in SH, mRNA in TH, sRNA and mRNA in SHT, and duplex respectively (all values = 0.14 min<sup>-1</sup>).  $\beta_H$  and  $\beta_P$  are the

degradation rate constants for Hfq (free and bound forms) and target protein (both values =  $0.03 \text{ min}^{-1}$ ).  $k_S$ ,  $k_T$ ,  $k_{SH}$ ,  $k_{TH}$ ,  $k_{STH}$  and  $k_{TSH}$  are the RNA binding rate constants (all values =  $1 \text{ nM}^{-1} \cdot \text{min}^{-1}$ ).  $k_{-S}$ ,  $k_{-T}$ ,  $k_{-SH}$ ,  $k_{-TH}$ ,  $k_{-STH}$  and  $k_{-TSH}$  are the RNA dissociation rate constants (all values =  $0.1 \text{ min}^{-1}$ ).  $k_{\text{Dup}}$  is the rate constant for duplex formation and release from the SHT complex (value =  $1 \text{ min}^{-1}$ ).

## Supplementary References

1. Hussein, R. and Lim, H.N. (2012) Direct comparison of small RNA and transcription factor signaling. *Nucleic Acids Res*, **40**, 7269-7279.
2. Hussein, R. and Lim, H.N. (2011) Disruption of small RNA signaling caused by competition for Hfq. *Proc Natl Acad Sci U S A*, **108**, 1110-1115.
3. Lutz, R. and Bujard, H. (1997) Independent and tight regulation of transcriptional units in *Escherichia coli* via the LacR/O, the TetR/O and AraC/I1-I2 regulatory elements. *Nucleic Acids Res*, **25**, 1203-1210.
4. Adamson, D.N. and Lim, H.N. (2013) Rapid and robust signaling in the CsrA cascade via RNA-protein interactions and feedback regulation. *Proc Natl Acad Sci U S A*, **110**, 13120-13125.
5. Franchini, A.G. and Egli, T. (2006) Global gene expression in *Escherichia coli* K-12 during short-term and long-term adaptation to glucose-limited continuous culture conditions. *Microbiology*, **152**, 2111-2127.
6. Urban, J.H. and Vogel, J. (2008) Two seemingly homologous noncoding RNAs act hierarchically to activate glmS mRNA translation. *PLoS Biol*, **6**, e64.
7. Urban, J.H. and Vogel, J. (2009) A green fluorescent protein (GFP)-based plasmid system to study post-transcriptional control of gene expression in vivo. *Methods Mol Biol*, **540**, 301-319.

## Supplementary Figure Legends

### Figure S1. Plasmid maps.

### Figure S2. Relative strengths of the different promoters and ribosome binding sequences (RBS).

Measurements were obtained by placing *gfp* under the control of different promoters and RBS and measuring GFP fluorescence by flow cytometry. Note the measurements were performed on different dates to the measurements in **Figs. S3-S5** and should not be directly compared to them. **(A)** Relative expression of PCon and PConM8 (-35 site is mutated from 5' TTGACA 3' to 5' TTTACA 3' and the -10 site is mutated from 5' TATAAT 3' to 5' TATGGT 3'). Mean expression for PCon and PConM8 are  $4.24 \pm 0.41$  a.u. and  $44.83 \pm 3.13$  a.u. Errors are the SEM. Each promoter was measured in triplicate. Strains: HL2516 (PCon) and HL2916 (PConM8). **(B)** Relative expression of PLtetO-1 and PLtetO-1M9 (-10 site is mutated from 5' GATACT 3' to 5' GAGACT 3'). Mean expression for PLtetO-1 and PLtetO-1M9 are  $3.90 \pm 0.20$  a.u. and  $40.57 \pm 1.32$  a.u. Each promoter was measured in duplicate. Details of the PLtetO-1 and PLtetO-1M9 promoters are reported elsewhere (2,3). Strains: HL1085 (PLtetO-1) and HL1672 (PLtetO-1M9). **(C)** Relative expression of GFP with the st7 and T710 RBS. The *gfp* was transcribed from the PLlacO-1 promoter at maximum induction (1 mM IPTG). Mean expression with the st7 and T710 RBS are  $220.46 \pm 5.87$  a.u. and  $409.19 \pm 15.09$  a.u. All errors are the SEM. Each RBS was measured in triplicate. Strains: HL6442 (st7 RBS) and HL5189 (T710 RBS).

**Figure S3. GFP expression with the st7 and T710 RBS.** Measurements were obtained by placing *gfp* under the control of the PLlacO-1 promoter and measuring GFP fluorescence by flow cytometry at different concentrations of IPTG. Error bars are the SEM of triplicate measurements. Total  $n = 48$ . Strains: HL5189 (PLlacO-1:T710::*gfp*) and HL6442 (PLlacO-1:st7::*gfp*). Note the measurements were performed on different dates to the measurements in **Figs. S2, S4 and S5** and should not be directly compared to them.

**Figure S4. GFP expression and relative induction of PLLacO-1 at different IPTG concentrations measured in parallel with the samples in Fig 4B.** Measurements were obtained by placing the *gfp* gene under the control of the PLLacO-1 promoter and measuring GFP fluorescence by flow cytometry at different concentrations of IPTG. Error bars are the SEM. Note the measurements were performed on different dates to the measurements in **Figs. S2, S3 and S5** and should not be directly compared to them. **(A)** GFP expression with the st7 RBS in strain HL6582, which has both chr. *hfq* and *ryhB* deleted, as a function of IPTG concentration. Measurements were performed in triplicate at each concentration. Total  $n = 21$ . The line is a guide to the eye of the mean GFP expression at each IPTG concentration. **(B)** Relative induction as a function of IPTG concentration. The relative induction was calculated by subtracting the mean GFP fluorescence value at 0  $\mu\text{M}$  from the mean values obtained at all IPTG concentrations, and then dividing by the mean GFP fluorescence at 1000  $\mu\text{M}$  to normalize the values.

**Figure S5. Relative strengths of the PLtetO-1, PLLacO-1 and PCon promoters.** Measurements were obtained by placing *gfp* with the same RBS from *ompC* under the control of different promoters and measuring GFP fluorescence by flow cytometry. Strains: HL3167 (PLtetO-1:*ompC*::*gfp*), HL3186 (PLLacO-1:*ompC*::*gfp*) and HL3268 (PLtetO-1Con:*ompC*::*gfp*). Each strain was measured in duplicate biological replicates. Total  $n = 6$ . Note the measurements were performed on different dates to the measurements in **Figs. S2-S4** and should not be directly compared to them.

**Figure S6. Additional experiments with varying sRNA and mRNA production for the RyhB and MicC silencing sRNAs.** Error bars are the SEM of duplicate measurements (panels **A, B, and G**) or root mean square error calculated from the SEM (panels **C, D and H**). **(A, B)** GFP expression as a function *sodB* and *ompC* transcription in strains with chromosomal *hfq* deleted. These delta chr. *hfq* measurements were performed identically and with the same plasmids as the measurements with chromosomal *hfq* (**Fig. 5**). Strains: HL3333 (no RyhB, *sodB*), HL2413 (RyhB, *sodB*), HL2411 (MicC, *ompC*) and HL3610 (no MicC, *ompC*). **(C, D)** RyhB and MicC activity as a function of relative mRNA production in the absence of Hfq. sRNA activity was calculated by subtracting the average GFP fluorescence value with the sRNA from the average value without the sRNA at each level of mRNA

induction. Relative mRNA production at different IPTG concentrations was determined using previously reported data (2). **(E)** Simulation of GFP expression for a target mRNA that is only translated in the free state as a function of sRNA production. **(F)** Genetic circuit used to investigate the effect of varying sRNA production on sRNA activity with constant Hfq and mRNA production. sRNA production was varied by placing the gene under the inducible PLlacO-1 promoter. **(G, H)** GFP expression and sRNA activity as a function of sRNA production. Total  $n = 20$  per strain with duplicate measurements for each IPTG concentration. Strains: HL2625 (RyhB, *sodB*) and HL839 (MicC, *ompC*).

## Supplementary Table Legends

### Table S1. Plasmids and strains.

†Note: For brevity the absence of the Hind III restriction enzyme site in the PCon and PConM8 promoters was not stated in **Fig. S5** and the main text. That is, PConNoHind = PCon and PConNoHindM8 = PConM8 except where otherwise indicated (e.g. pHL533 and pHL671). \* Reported in (2). # Reported in (1). ‡ Reported in (4). † Reported in (5) as K1 fw or K1 rev.

### Table S2. Oligonucleotides.

\* Reported in (2). ‡ Reported in (4). ◇ Reported in (6). § Reported in (7). qRT-PCR = quantitative reverse transcriptase polymerase chain reaction.



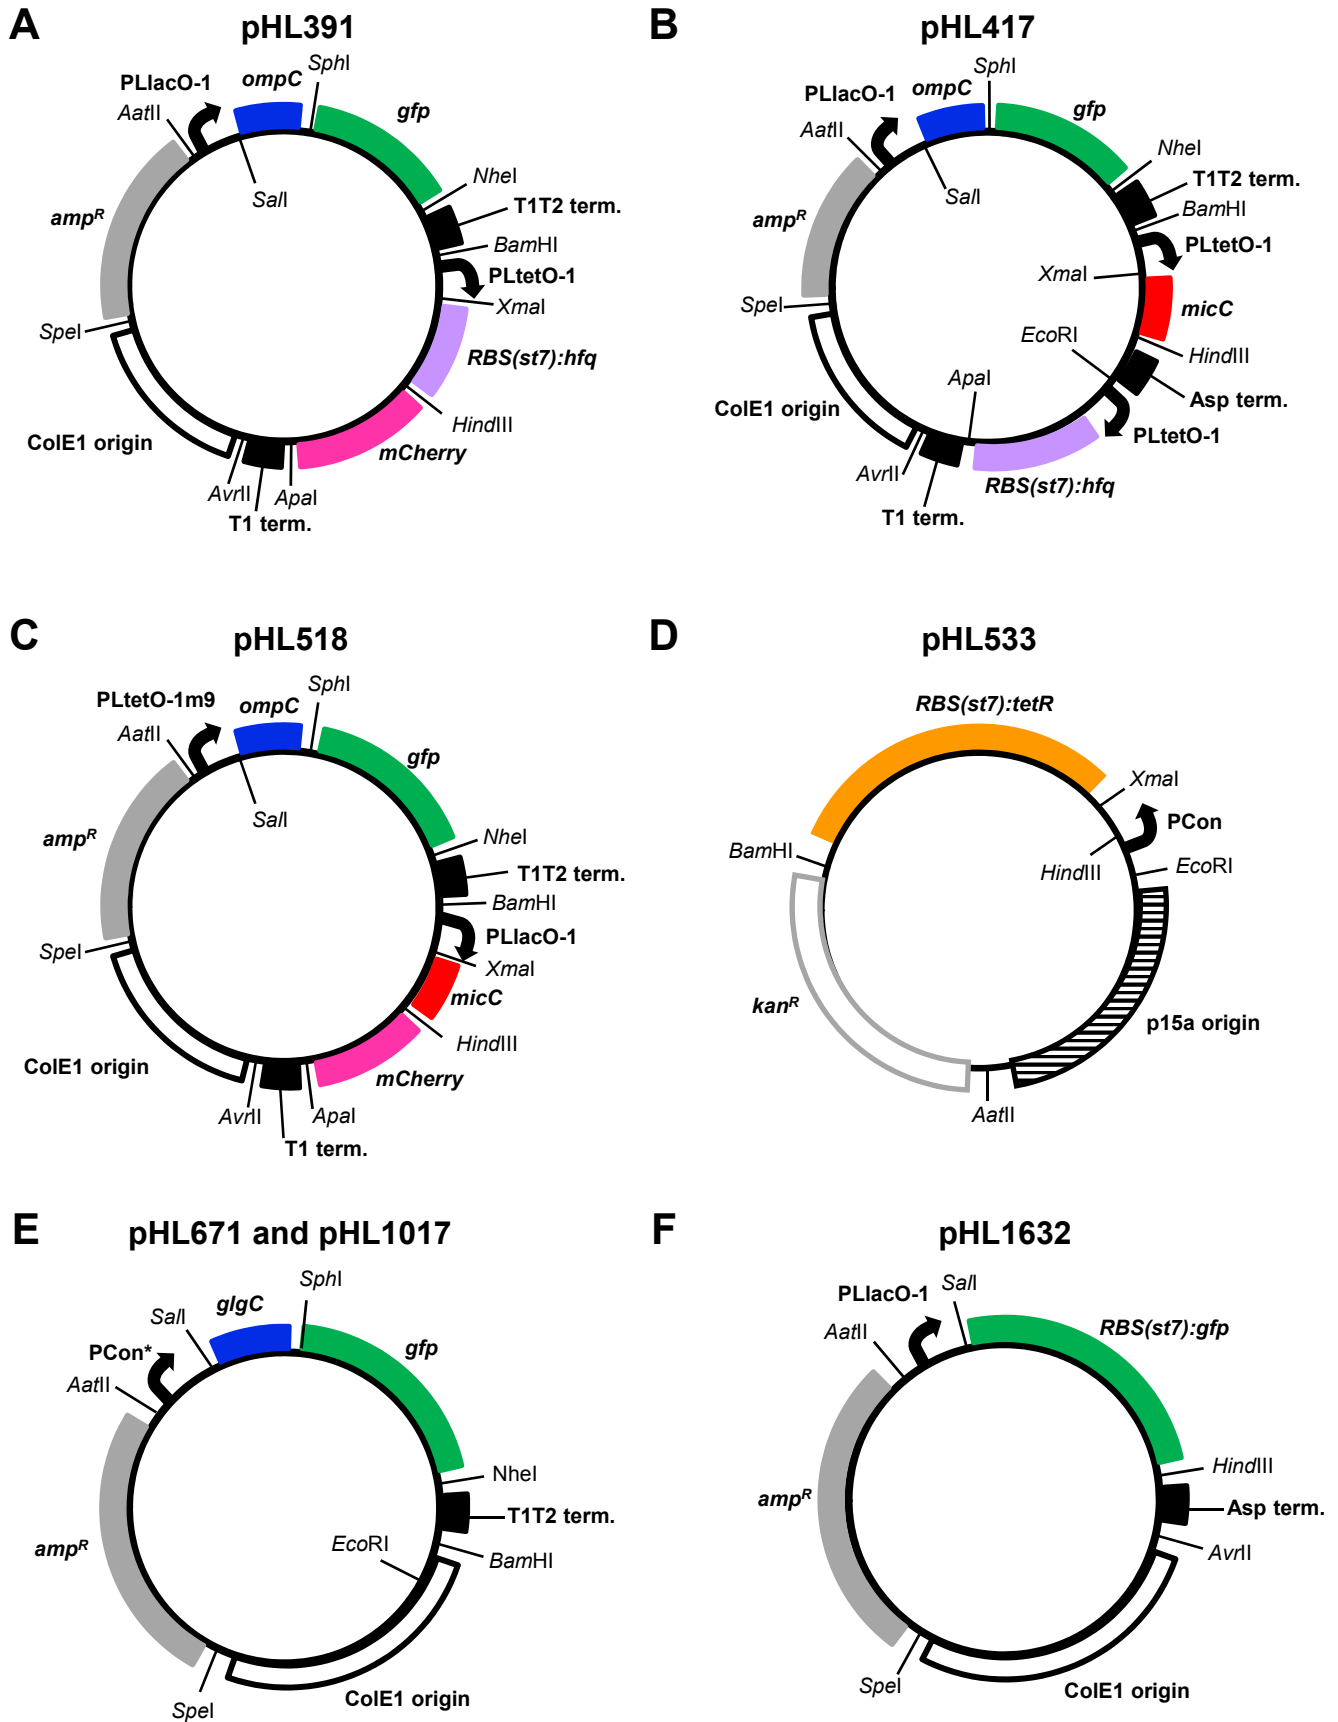

\* *PCon* with *HindIII* site (pHL671) or *PConM8* (pHL1017)

Figure S1. Plasmid maps.

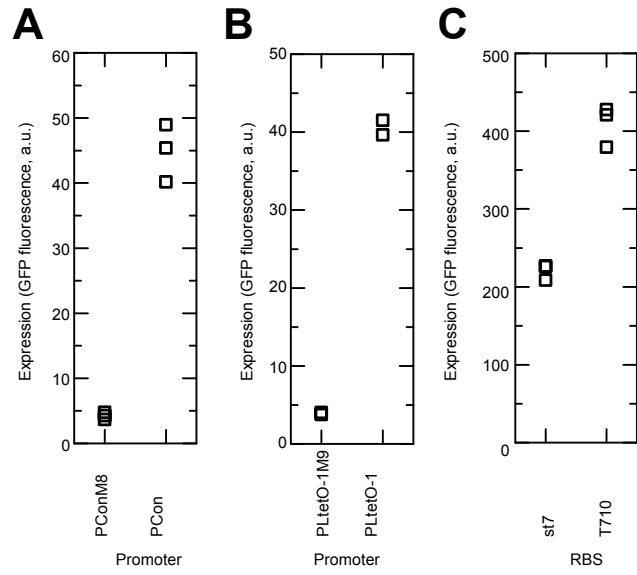

**Figure S2. Relative strengths of the different promoters and ribosome binding sequences (RBS).**

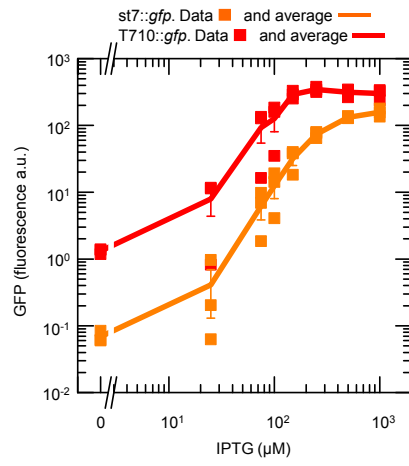

Figure S3. GFP expression with the *st7* and *T710* RBS.

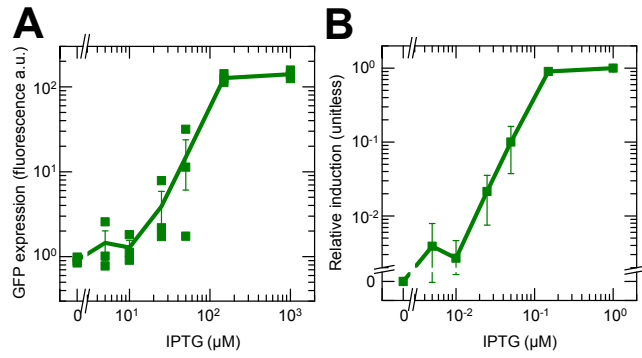

**Figure S4. GFP expression and relative induction of PLlacO-1 at different IPTG concentrations measured in parallel with the samples in Fig 4B.**

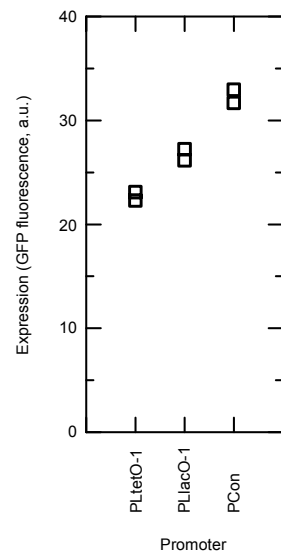

**Figure S5. Relative strengths of the PLtetO-1, PLlacO-1 and PCon promoters.**

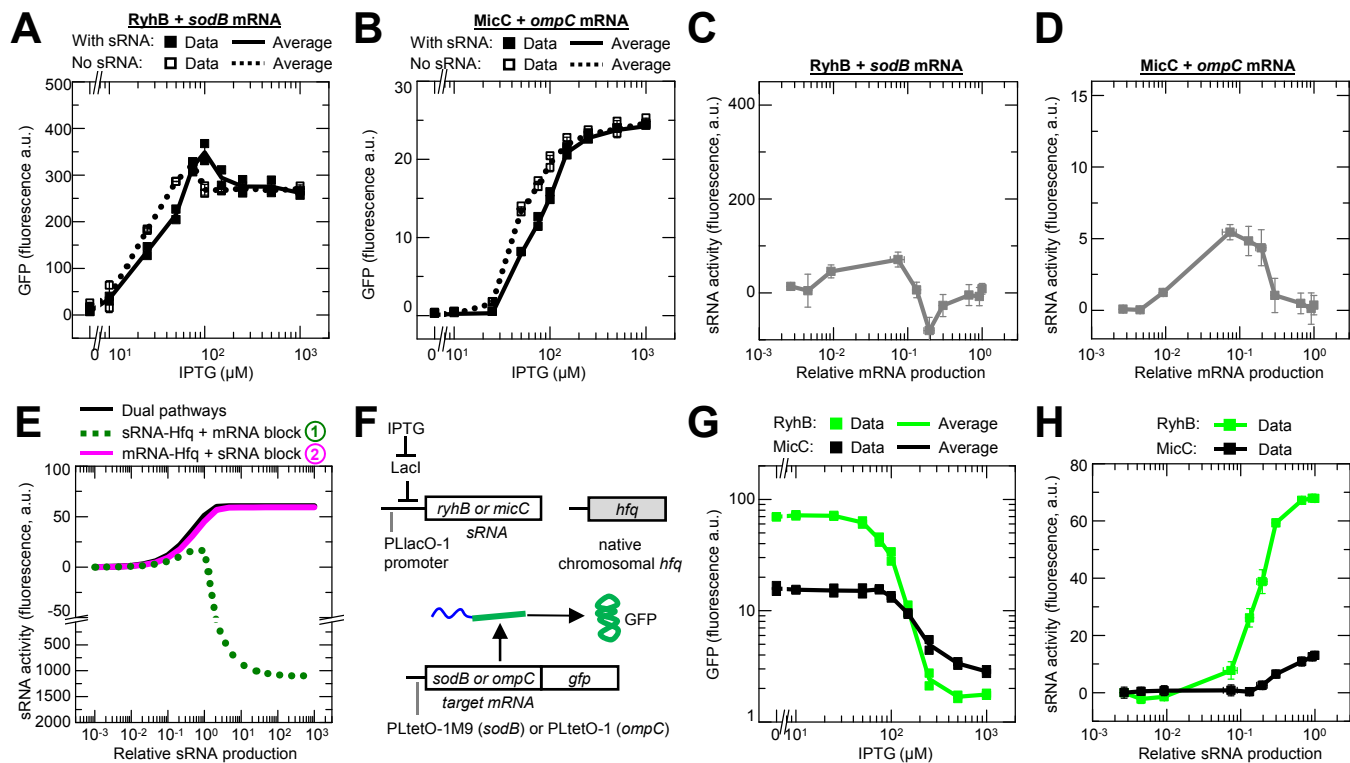

Figure S6. Additional experiments with varying sRNA and mRNA production for the RyhB and MicC silencing sRNAs.

**Table S1. Plasmids and strains.**

| Plasmid (pHL)/<br>Strain (HL) | Description†                                                                                                                                               | Antibiotic<br>Resistance |
|-------------------------------|------------------------------------------------------------------------------------------------------------------------------------------------------------|--------------------------|
| <i>pHL108*</i>                | AmpR + PLlacO-1:: <i>micC::mCherry::T1</i> terminator + PLtetO-1:: <i>ompC::gfp::T1T2</i> terminator + ColE1                                               | amp                      |
| <i>pHL269*</i>                | AmpR + PLtetO-1:: <i>micC::mCherry::T1</i> terminator + PLlacO-1:: <i>ompC::gfp::T1T2</i> terminator + ColE1                                               | amp                      |
| <i>pHL282*</i>                | AmpR + PLtetO-1:: <i>mCherry::T1</i> terminator + PLlacO-1:: <i>ompC::gfp::T1T2</i> terminator + ColE1                                                     | amp                      |
| <i>pHL391</i>                 | AmpR + PLtetO-1::RBS (st7) <i>hfq::mCherry::T1</i> terminator + PLlacO-1:: <i>ompC::gfp::T1T2</i> terminator + ColE1                                       | amp                      |
| <i>pHL417</i>                 | AmpR + PLtetO-1:: <i>micC::Asp</i> terminator + PLlacO-1:: <i>ompC::gfp::T1T2</i> terminator + PLtetO-1::RBS (st7) <i>hfq::T1</i> terminator + ColE1       | amp                      |
| <i>pHL518</i>                 | AmpR + PLlacO-1:: <i>micC::mCherry::T1</i> terminator + PLtetO-1m9:: <i>ompC::gfp::T1T2</i> terminator + ColE1                                             | amp                      |
| <i>pHL533</i>                 | KanR + PCon::RBS(st7) <i>tetR</i> + p15a. Used to integrate PCon::RBS (st7) <i>tetR</i> into the chromosome at <i>galk</i> .                               | kan                      |
| <i>pHL600‡</i>                | KanR + PLtetO-1:: <i>csrB::T1</i> terminator + PLlacO-1::RBS (st7) <i>csrA::Asp</i> terminator + p15a                                                      | kan                      |
| <i>pHL671</i>                 | AmpR + PCon:: <i>glgC::gfp::T1T2</i> terminator + ColE1                                                                                                    | amp                      |
| <i>pHL720*</i>                | AmpR + PLtetO-1:: <i>mCherry::T1</i> terminator + PLlacO-1:: <i>sodB::gfp::T1T2</i> terminator + ColE1                                                     | amp                      |
| <i>pHL745*</i>                | AmpR + PLtetO-1:: <i>ryhB::mCherry::T1</i> terminator + PLlacO-1:: <i>sodB::gfp::T1T2</i> terminator + ColE1                                               | amp                      |
| <i>pHL841*</i>                | AmpR + PLtetO-1:: <i>ryhB::mCherry::T1</i> terminator + PLlacO-1:: <i>ompC::gfp::T1T2</i> terminator + ColE1                                               | amp                      |
| <i>pHL908*</i>                | AmpR + PLlacO-1:: <i>ryhB::mCherry::T1</i> terminator + PLtetO-1m9:: <i>sodB::gfp::T1T2</i> terminator + ColE1                                             | amp                      |
| <i>pHL1009*</i>               | AmpR + PLtetO-1::RBS (st7) <i>gfp::T1T2</i> terminator + PLlacO-1:: <i>micC</i> + ColE1                                                                    | amp                      |
| <i>pHL1011*</i>               | AmpR + PLtetO-1m9::RBS (st7) <i>gfp::T1T2</i> terminator + PLlacO-1:: <i>ryhB</i> + ColE1                                                                  | amp                      |
| <i>pHL1017</i>                | AmpR + PConNoHindM8:: <i>glgC::gfp::T1T2</i> terminator + ColE1                                                                                            | amp                      |
| <i>pHL1228*</i>               | AmpR + PLtetO-1:: <i>dsrA::mCherry::T1</i> terminator + PLlacO-1:: <i>ompC::gfp::T1T2</i> terminator + ColE1                                               | amp                      |
| <i>pHL1632</i>                | AmpR + PLlacO-1::RBS (st7) <i>gfp::Asp</i> terminator + ColE1                                                                                              | amp                      |
| <i>pHL1633</i>                | AmpR + PLlacO-1::T710 <i>gfp::Asp</i> terminator + ColE1                                                                                                   | amp                      |
| <i>pHL1884</i>                | AmpR + PLlacO-1:: <i>glmS::gfp::T1T2</i> terminator + Asp terminator + ColE1                                                                               | amp                      |
| <i>pHL1954</i>                | AmpR + PConNoHindM8:: <i>ryhB::Asp</i> terminator + PLlacO-1::RBS (st7) <i>hfq::T1</i> terminator + PLtetO-1m9:: <i>sodB::gfp::T1T2</i> terminator + ColE1 | amp                      |
| <i>pHL1969</i>                | AmpR + PConNoHindM8:: <i>ryhB::Asp</i> terminator + PLlacO-1::T710 <i>hfq::T1</i> terminator + PLtetO-1m9:: <i>sodB::gfp::T1T2</i> terminator + ColE1      | amp                      |
| <i>pHL1979</i>                | AmpR + PCon:: <i>glmZ::T1T2</i> terminator + ColE1                                                                                                         | amp                      |
| <i>pHL2021</i>                | AmpR + PLlacO-1::T710 <i>hfq::T1</i> terminator + PLtetO-1m9:: <i>sodB::gfp::T1T2</i> terminator + ColE1                                                   | amp                      |
| <i>pHL2026</i>                | AmpR + PLlacO-1::T710 <i>hfq::T1</i> terminator + PLtetO-1m9:: <i>glmS::gfp::T1T2</i> terminator + ColE1                                                   | amp                      |
| <i>pHL2027</i>                | AmpR + PLlacO-1::T710 <i>hfq::T1</i> terminator + PLtetO-1:: <i>glmS::gfp::T1T2</i> terminator + ColE1                                                     | amp                      |
| <i>pHL2053</i>                | AmpR + PLlacO-1::T710:: <i>hfq::T1</i> terminator + PLtetO-1m9:: <i>ompC::gfp::T1T2</i> terminator + ColE1                                                 | amp                      |
| <i>pHL2073</i>                | AmpR + PConShortNoHind:: <i>glmZ::Asp</i> terminator + PLlacO-1::T710 <i>hfq::T1</i> terminator + PLtetO-1m9:: <i>glmS::gfp::T1T2</i> terminator + ColE1   | amp                      |
| <i>pHL2075</i>                | AmpR + PConShortNoHind:: <i>glmZ::Asp</i> terminator + PLlacO-1::T710 <i>hfq::T1</i> terminator + PLtetO-1:: <i>glmS::gfp::T1T2</i> terminator + ColE1     | amp                      |
| <i>pHL2084</i>                | AmpR + PConShortNoHindM8:: <i>glmZ::Asp</i> terminator + PLlacO-1::T710 <i>hfq::T1</i> terminator + PLtetO-1m9:: <i>glmS::gfp::T1T2</i> terminator + ColE1 | amp                      |
| <i>pHL2085</i>                | AmpR + PConShortNoHindM8:: <i>glmZ::Asp</i> terminator + PLlacO-1::T710 <i>hfq::T1</i> terminator + PLtetO-1:: <i>glmS::gfp::T1T2</i> terminator + ColE1   | amp                      |
| <i>pHL2107</i>                | AmpR + PConNoHindM8:: <i>micC::Asp</i> terminator + PLlacO-1::T710:: <i>hfq::T1</i> terminator + PLtetO-1m9:: <i>ompC::gfp::T1T2</i> terminator + ColE1    | amp                      |
| <i>pHL2117</i>                | AmpR + PConNoHindM8:: <i>ryhB::Asp</i> terminator + T1 terminator + PLtetO-1m9:: <i>sodB::gfp::T1T2</i> terminator + ColE1                                 | amp                      |
| HL716*                        | MG1655 + pKD46 + <i>lacIq</i> inserted into the chromosome at <i>intS</i>                                                                                  | none                     |
| HL770*                        | HL716 + $\Delta hfq$                                                                                                                                       | none                     |

|         |                                                                         |          |
|---------|-------------------------------------------------------------------------|----------|
| HL839*  | HL716 + pHL108                                                          | amp      |
| HL862*  | HL716 + $\Delta micC$                                                   | none     |
| HL1085# | HL862 + pHL108                                                          | amp      |
| HL1128* | HL862 + $\Delta hfq$                                                    | none     |
| HL1178* | HL862 + pHL282                                                          | amp      |
| HL1672  | HL862 + pHL518                                                          | amp      |
| HL1706  | HL716 + $\Delta csrB$                                                   | none     |
| HL1752  | HL1706 + $\Delta csrC$                                                  | none     |
| HL1933  | HL1752 + PCon:: <i>tetR</i> inserted into the chromosome at <i>galk</i> | none     |
| HL2300* | HL716 + pHL745                                                          | amp      |
| HL2304* | HL716 + pHL269                                                          | amp      |
| HL2325  | HL716 + pHL417                                                          | amp      |
| HL2378  | HL1933 + $\Delta glgCAP$                                                | none     |
| HL2411  | HL770 + pHL269                                                          | amp      |
| HL2413  | HL770 + pHL745                                                          | amp      |
| HL2483  | HL2378 + $\Delta csrD$                                                  | none     |
| HL2516  | HL2483 + pHL600 + pHL671                                                | amp, kan |
| HL2625* | HL716 + pHL908                                                          | amp      |
| HL2752* | HL716 + $\Delta ryhB$                                                   | none     |
| HL2817* | HL716 + pHL720                                                          | amp      |
| HL2839* | HL2752 + pHL720                                                         | amp      |
| HL2916  | HL2483 + pHL600 + pHL1017                                               | amp, kan |
| HL3186* | HL716 + pHL282                                                          | amp      |
| HL3333  | HL770 + pHL720                                                          | amp      |
| HL3338* | HL770 + $\Delta ryhB$                                                   | none     |
| HL3373* | HL2752 + pHL1011                                                        | amp      |
| HL3395* | HL862 + pHL1009                                                         | amp      |
| HL3610  | HL770 + pHL282                                                          | amp      |
| HL3611  | HL716 + pHL391                                                          | amp      |
| HL3612* | HL716 + pHL841                                                          | amp      |
| HL3619* | HL716 + pHL1228                                                         | amp      |
| HL5189  | HL716 + pHL1633                                                         | amp      |
| HL5226  | HL716 + $\Delta glmZ$                                                   | none     |
| HL5410  | HL5226 + $\Delta hfq$                                                   | none     |
| HL5963  | HL5390 + pHL1884                                                        | amp      |
| HL6199  | HL2752 + pHL1954                                                        | amp      |
| HL6200  | HL2752 + pHL1969                                                        | amp      |
| HL6257  | HL5390 + pHL1979                                                        | amp      |
| HL6357  | HL3338 + pHL2021                                                        | amp      |
| HL6361  | HL3338 + pHL1969                                                        | amp      |
| HL6370  | HL3338 + pHL1954                                                        | amp      |
| HL6379  | HL5410 + pHL2026                                                        | amp      |
| HL6380  | HL5410 + pHL2027                                                        | amp      |
| HL6442  | HL716 + pHL1632                                                         | amp      |
| HL6476  | HL5410 + pHL2073                                                        | amp      |
| HL6477  | HL5410 + pHL2075                                                        | amp      |
| HL6526  | HL5410 + pHL2084                                                        | amp      |
| HL6527  | HL5410 + pHL2085                                                        | amp      |
| HL6555  | HL1128 + pHL2053                                                        | amp      |
| HL6566  | HL1128 + pHL2107                                                        | amp      |
| HL6581  | HL2752 + pHL2117                                                        | amp      |
| HL6582  | HL3338 + pHL1632                                                        | amp      |

---



**Table S2. Oligonucleotides.**

| Oligonucleotide          | Description                                                                                             | Sequence (5' to 3')                                                        |
|--------------------------|---------------------------------------------------------------------------------------------------------|----------------------------------------------------------------------------|
| AsptermAvrR              | PCR synthesis of Asp terminator from pLEX                                                               | agacctaggactgctcacaagaaaaaaggcaccg                                         |
| AsptermEcoRIR*           | PCR synthesis of Asp terminator from pLEX                                                               | ccggaattcactgctcacaagaaaaaaggcaccg                                         |
| AsptermHindIIIF*         | PCR synthesis of Asp terminator from pLEX                                                               | ggccaagcttaatcgtagcagggtagtagcaaaata                                       |
| ColEApalF*               | Amplify Ampicillin resistance, ColE origin with T1 terminator from pZE21                                | gacggggccatggtagcggctgtagaggg                                              |
| csrBKOpKD1F‡             | For deletion of <i>csrB</i> using pKD13 as template                                                     | agcgcctgtaagactcgcgaaaaagacgattctatc<br>ttcgtcgacagggttaggctggagctgcttc    |
| csrBKOpKD4R‡             | For deletion of <i>csrB</i> using pKD13 as template                                                     | gtggtcataaagcaacctcaataagaaaaactgccg<br>cgaaggatagcaggattccggggatccgtcgacc |
| csrCKOpKD1F‡             | For deletion of <i>csrC</i> using pKD13 as template                                                     | actgatggcgggtgattgttttaagcaaaaggcgtta<br>aagtagcaccggtaggctggagctgcttc     |
| csrCKOpKD4R‡             | For deletion of <i>csrC</i> using pKD13 as template                                                     | gccgtttttcagtagatgattgctggcggaatctaaccg<br>aaagcaagcaattccggggatccgtcgacc  |
| csrDpKD1F‡               | For deletion of <i>csrD</i> using pKD12 as template                                                     | atctgattgtagtagtaccgcttctcactatcggagtt<br>aacacaagggtgtaggctggagctgcttc    |
| csrDpKD4R‡               | For deletion of <i>csrD</i> using pKD12 as template                                                     | catgagacgcagcgcattattctacgtgaaaacgg<br>atlaaacggcaggattccggggatccgtcgacc   |
| gfpRBSSalF*              | PCR <i>gfp</i> with RBS7 and <i>SalI</i> site from pTAK 102                                             | cctgtcgactaaggagaaaaaaatgctgtaaaggga<br>gaagaacttttc                       |
| gfpRBSSphF               | PCR <i>gfp</i> with RBS7 and <i>SphI</i> site from pTAK 102                                             | tacgcatgctaaggagaaaaaaatgctgtaaagg<br>agaagaacttttc                        |
| glgCleadSalF‡            | PCR 5'UTR of <i>glgC</i> leader for fusion to <i>gfp</i>                                                | cctgtcgactctggcaggacctgcacacgaggattg                                       |
| glgCleadSphR‡            | PCR 5'UTR of <i>glgC</i> leader for fusion to <i>gfp</i>                                                | tacgcatgctaaccatgactaactccttttatcatctctg<br>g                              |
| glgCpKD1F‡               | For deletion of <i>glgCAP</i> using pKD13 as template                                                   | cctgcacacggattgtgtgttccagagatgataaaa<br>aaggagttagctgtgtaggctggagctgcttc   |
| glgPpKD4R‡               | For deletion of <i>glgCAP</i> using pKD13 as template                                                   | ttacaatctaccggatcgatgcccagatgatcgccg<br>gtactcttgaattccggggatccgtcgacc     |
| glmSstartSphR§           | PCR <i>glmS</i> with <i>SalI</i> site added at the end of <i>glmU</i> to fuse to <i>gfp</i> and qRT-PCR | ttacgcatgctcgcgccaacaattccacacat                                           |
| glmSUpSalF               | qRT-PCR                                                                                                 | ttagtcgaccccggtcacatgggatgaggagat                                          |
| glmUendSalF§             | PCR <i>glmS</i> with <i>SalI</i> site added at the end of <i>glmU</i> to fuse to <i>gfp</i>             | ttagtcgaccgtgtgccgacagactcagaaagaa                                         |
| glmZ1stMutR              | qRT-PCR                                                                                                 | acgcctgctcttattacggagcaggcgttaaacagct<br>ctgtatgagaacaagtggtgc             |
| glmZHindR◇               | PCR <i>glmZ</i> with native terminator                                                                  | ggccaagcttggccttctgatacaaaaaaacgc                                          |
| glmZKOpKD1F              | For deletion of <i>glmZ</i> using pKD13 as template                                                     | tagttccttccaccggaggcaagcacctccggggcc<br>ttctgatacatgtaggctggagctgcttc      |
| glmZKOpKD4R              | For deletion of <i>glmZ</i> using pKD13 as template                                                     | acaagtgtaaggatgatttcccattctctgtggcat<br>aataaacgaattccggggatccgtcgacc      |
| glmZXmaF◇                | PCR <i>glmZ</i> and qRT-PCR                                                                             | cctccgggtagatgctcattccatctcttat                                            |
| HfqApalR*                | PCR <i>hfq</i> with RBS (st7)                                                                           | gacgggcccttattcggtttctcgtctcctg                                            |
| HfqHindR*                | PCR <i>hfq</i> with RBS (st7)                                                                           | ggccaagcttattcggtttctcgtctcctg                                             |
| HfqnoRBSBamF             | PCR <i>hfq</i> without RBS                                                                              | cgggatccatggctaaggggcaatctttacaag                                          |
| HfqRBSXmalF*             | PCR <i>hfq</i> with RBS (st7)                                                                           | cctccgggtaaggagaaaaaaatggctaaggg<br>gcaatctttacaag                         |
| mCherryApalR*            | PCR <i>mCherry</i>                                                                                      | catgggcccttactgtacagctcgtccatgcc                                           |
| mCherryRBSBsiWIHindIIIF* | PCR <i>mCherry</i>                                                                                      | tcttaaaagcttataaagaggagaaacgtacgatggt<br>gagcaaggcgaggagg                  |
| MicC1XmalF*              | PCR <i>micC</i> and qRT-PCR                                                                             | tcctccgggttatatgctttattgtcacaga                                            |
| MicC2HindIIIR*           | PCR <i>micC</i> with native terminator                                                                  | ggccaagcttctggataaggattatccaattcta                                         |
| MicC3NoTermHindIIIR*     | qRT-PCR                                                                                                 | ggccaagcttctggctgtcttttatatgt                                              |
| PConEcoRF*               | PCR synthesis of PCon promoter                                                                          | ccggaattctcgagcaccgtggtgtgacatttttaagct<br>tggcggttataat                   |
| PConGalkR                | For integration of PCon:: <i>tetR</i> at <i>galk</i>                                                    | gtttgcgcgagtcagcgatattcttttcgcaatccg<br>gagtgtagaatcgagcaccgtcgtgtgtgac    |
| PConM8NoHindAatF‡        | PCR synthesis of PConM8 promoter with no <i>HindIII</i> site                                            | cgcgactctcgagcaccgtcgtgtttacattttatgctt<br>ggcggttatggt                    |

|                       |                                                                                                               |                                                                                    |
|-----------------------|---------------------------------------------------------------------------------------------------------------|------------------------------------------------------------------------------------|
| PConM8NoHindBamHF     | PCR synthesis of PConM8 promoter with no <i>HindIII</i> site                                                  | cgcggatcctcgagcaccgctggtttacattttatgctt<br>ggcggttatggt                            |
| PConM8NoHindSalR      | PCR synthesis of PConM8 promoter with no <i>HindIII</i> site                                                  | ttagtcgacgaatccaccataaccgccaagcataaaa<br>atgtaacaac                                |
| PConM8NoHindXmaR      | PCR synthesis of PConM8 promoter with no <i>HindIII</i> site                                                  | cctcccggggaatccaccataaccgccaagcataaa<br>aatgtaacaac                                |
| PConM8ShortNoHindXmaR | PCR synthesis of PConM8 promoter with no <i>HindIII</i> site<br>with deletion of 12 b.p. from 5' end of oligo | cctcccgggaccataaccgccaagcataaaaatgta<br>aacaac                                     |
| PConAatF              | PCR synthesis of PCon promoter                                                                                | cgcgacgtctcgagcaccgctggttgacattttaagc<br>ttggcggttataat                            |
| PConNoHindBamHF*      | PCR synthesis of PCon promoter with no <i>HindIII</i> site                                                    | cgcggatcctcgagcaccgctggttgacattttatgct<br>ttggcggttataat                           |
| PConSalR              | PCR synthesis of PCon promoter                                                                                | ttagtcgacctgtgtggaatccattataaccgccaagct<br>aaaaatgtaacaac                          |
| PConNoHindXmaR*       | PCR synthesis of PCon promoter with no <i>HindIII</i> site                                                    | cctcccggtgtgtggaatccattataaccgccaagca<br>taaaaatgtaacaac                           |
| PConShortNoHindXmaR2  | PCR synthesis of PCon promoter with no <i>HindIII</i> site<br>with deletion of 12 b.p. from 5' end of oligo   | cctcccggtattataaccgccaagcataaaaatgta<br>acaac                                      |
| PConXmaR*             | PCR synthesis of PCon promoter                                                                                | cctcccggtgtgtggaatccattataaccgccaagct<br>aaaaatgtaacaac                            |
| pKD1FAatII            | PCR <i>kanR</i> with FRT sites                                                                                | ctagacgtcgtgtaggctggagctgcttc                                                      |
| pKD1FGalKF            | For integration of PCon:: <i>tetR</i> at GalK                                                                 | ttcatattgtcagcgcagcgttgctgtacggcagccac<br>cagctctccgggtgtagctggagctgcttc           |
| pKD4RKpnl             | PCR <i>kanR</i> with FRT sites                                                                                | ttagtgaccattccgggatccgctcgacc                                                      |
| pLacEcoRF             | PCR synthesis of PLlacO-1 promoter with <i>EcoRI</i> site                                                     | ccggaattcgatccataaatgtgagcggataacattga<br>cattg                                    |
| pLacNotIF*            | PCR synthesis of PLlacO-1 promoter with <i>NotI</i> site                                                      | tcctcggcccgatccataaatgtgagcggataacat<br>tgacattg                                   |
| pLacO1BamHIF          | PCR synthesis of PLlacO-1 promoter with BamHI site                                                            | cgcggatccataaatgtgagcggataacattgacattg                                             |
| pLacpHNSAatSalF       | Fuses PLlacO-1 directly to target mRNA:: <i>gfp</i> , with <i>AatII</i><br>and <i>SalI</i> sites              | ctagacgtcataaatgtgagcggataacattgacattg<br>gagcggataacaagatactgacacaacaaccacc<br>cc |
| pLacXmaBamHT1T2R*     | PCR synthesis of PLlacO-1 promoter with <i>BamHI</i> and<br><i>XmaI</i> sites                                 | tcctcccgggagatcttcttatccgctcacaatgtcaat<br>gttatccgctcacattatggatcccctaggctca      |
| PLtetO1m9SalR*        | PCR synthesis of PLtetO-1m9 promoter with <i>SalI</i> site                                                    | caagtcgacagtctctatcactgatagggatgtcaat<br>ct                                        |
| pOmpC1SalIF*          | PCR <i>ompC</i> sequence to fuse to <i>gfp</i> and qRT-PCR                                                    | tactgtcactgcccactgattaatgaggggta                                                   |
| pOmpC2SphR*           | PCR <i>ompC</i> sequence to fuse to <i>gfp</i> and qRT-PCR                                                    | tacgcatgctagctgggaccaggaggacagtac                                                  |
| pTAKtermBamHIR        | PCR <i>gfp</i> with T1T2 term with <i>BamHI</i> site from pTAK102                                             | cgcggatcctgagcggatacatattgaaatgta                                                  |
| pTAKtermNotR          | PCR <i>gfp</i> with T1T2 term with <i>NotI</i> site from pTAK102                                              | tcctcggccgctgagcggatacatattgaaatgta                                                |
| pTetO-1SalIR*         | PCR synthesis of PLtetO-1 promoter with <i>SalI</i>                                                           | tactgtcagcagtatctatcactgatagggatgtcaat<br>ctctatcactgatagggga                      |
| pTetOBamHIF*          | PCR synthesis of PLtetO-1 promoter with <i>BamHI</i>                                                          | cgcggatcctccctatcagtgatagagattgacatccct<br>atcagtgatag                             |
| pTetOEcoRIF           | PCR synthesis of PLtetO-1 promoter with <i>EcoRI</i>                                                          | ccggaattcctccatcagtgatagagattgacatccct<br>atcagtgatag                              |
| pTetOXmalR*           | PCR synthesis of PLtetO-1 promoter with <i>XmaI</i>                                                           | cctcccgggagatctctatcactgatagggatgtcaat<br>ctctatcactg                              |
| RhyBHindR*            | PCR <i>ryhB</i> with native terminator                                                                        | ggccaagctgtggataaattgagaacgaaagat                                                  |
| RyhBnotermR*          | qRT-PCR                                                                                                       | ctaagtaataactggaagcaatgtg                                                          |
| rrnB1361F†            | qRT-PCR 16S loading control                                                                                   | gaatgccacggtgataacgtt                                                              |
| rrnB1475R†            | qRT-PCR 16S loading control                                                                                   | accactcccatggtgtga                                                                 |
| RhyBXmaF*             | PCR <i>ryhB</i> and qRT-PCR                                                                                   | cctcccgggcgatcaggaagaccctcgcgag                                                    |
| SodBSalIF*            | PCR <i>sodB</i> sequence to fuse to <i>gfp</i> and qRT-PCR                                                    | caagtgcaccatacgacaataaggctattgtacg                                                 |
| SodBSphR*             | PCR <i>sodB</i> sequence to fuse to <i>gfp</i> and qRT-PCR                                                    | tacgcatgctcgggtacctttaatcagggtggt                                                  |
| T710RBSKpnF           | PCR T710 RBS to fuse to <i>gfp</i> and <i>hfq</i>                                                             | cttaggtacctaagaaggagatatacatatg                                                    |
| T7codingRBS7BamR      | PCR T710 RBS to fuse to <i>gfp</i> and <i>hfq</i>                                                             | catggatccgcgaccatttgtgtccaccagctcatgct<br>agccatTTTTTctcctcta                      |
